# Supplementary material
Source: PubMed Central journal article supplement (PMC8082334)
Supplement: mmc1.pdf [file mmc1.pdf]

# Supporting Information

Reconstitution and functional characterization of SARS-CoV-2 proofreading complex

Zhijun Ma<sup>1</sup>, Yasin Pourfarjam<sup>1</sup>, and In-Kwon Kim<sup>1,\*</sup>

From the <sup>1</sup> Department of Chemistry, University of Cincinnati, 301 Clifton Ct, Cincinnati, Oh 45221, USA

Running title: *Reconstitution of SARS-CoV-2 proofreading complex*

\* To whom correspondence should be addressed: In-Kwon Kim, Department of Chemistry, University of Cincinnati, 301 Clifton Ct, Cincinnati, OH 45221, USA; E-mail: [kimiw@ucmail.uc.edu](mailto:kimiw@ucmail.uc.edu); Tel.: (513) 556-1909; Fax.: (513) 556-9239.

## Supporting information contents:

**Figure S1.** Sequence alignment of nsp14 and nsp10 of SARS-CoV-1 and SARS-CoV-2.

**Figure S2.** Expression of SARS-CoV-2 nsp14.

**Figure S3.** Purification of recombinant SARS-CoV-2 nsp14 and nsp10 proteins.

**Figure S4.** Size exclusion chromatography of recombinant SARS-CoV-2 nsp14 and nsp10 proteins.

**Table S1.** RNA and DNA oligonucleotides used in this study.

**A**

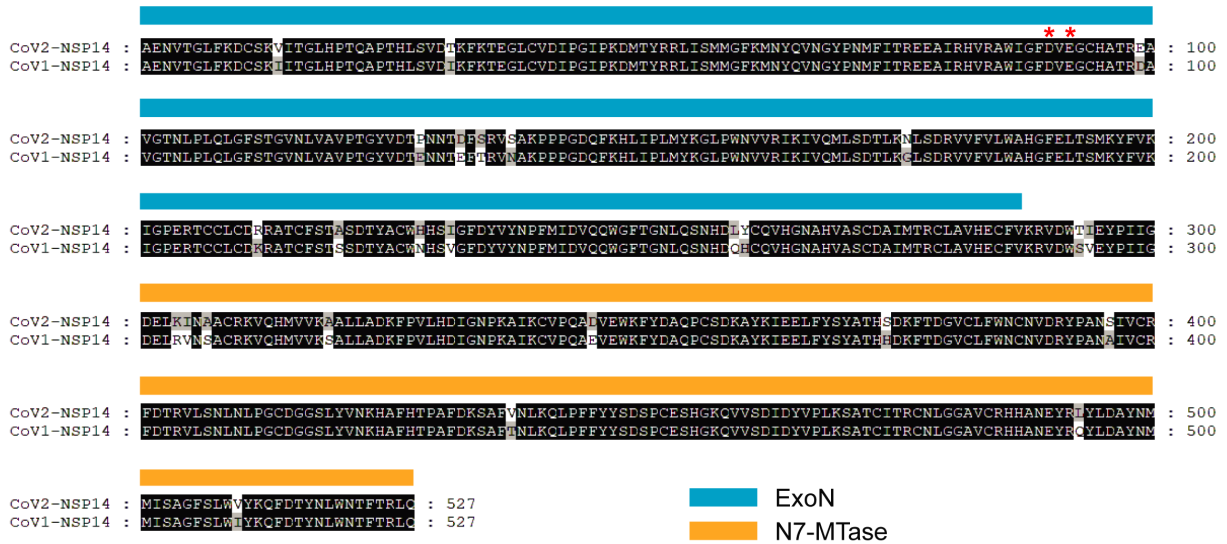

**B**

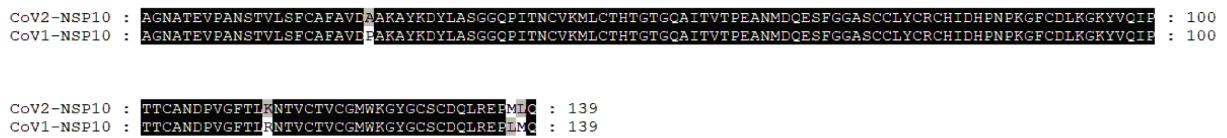

**Figure S1. Sequence alignment of nsp14 and nsp10 of SARS-CoV-1 and SARS-CoV-2. (A)** SARS-CoV-2 nsp14 shows 95% sequence identity to SARS-CoV-1 nsp14. Two domains of nsp14 (ExoN nad N7-MTase) are shown with sequence. Essential catalytic residues in SARS-CoV-2 nsp14 (1) are shown with red asterisks. (B) SARS-CoV-2 nsp10 shows 97% sequence identity to SARS-CoV-1 nsp10.

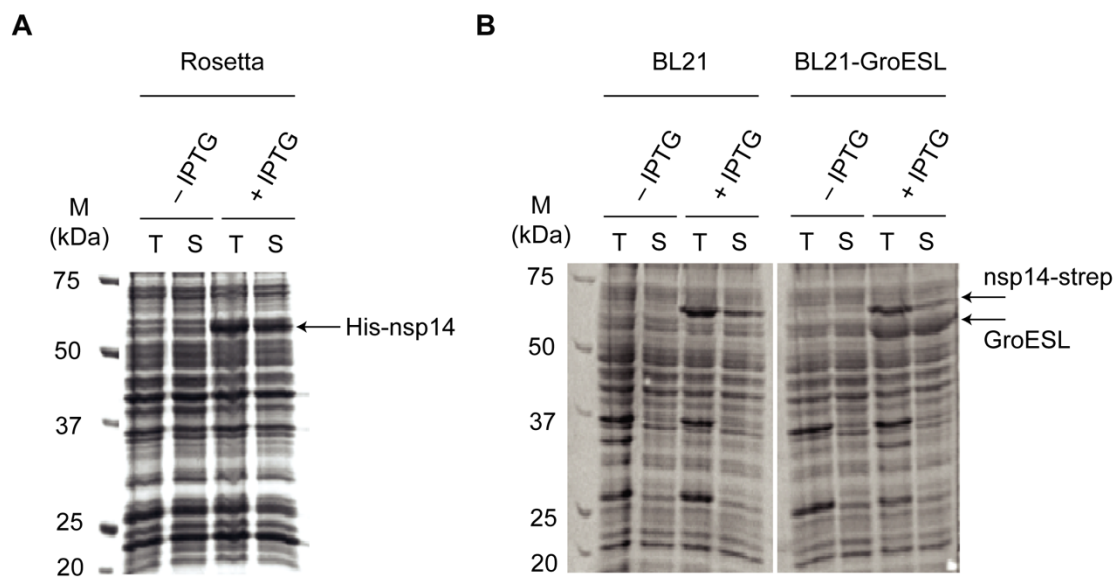

**Figure S2. Expression of SARS-CoV-2 nsp14.** His-tagged (A) and C-terminal strep-tagged (B) SARS-CoV-2 nsp14 was expressed in *E. coli* BL21(DE3) or Rosetta cells.

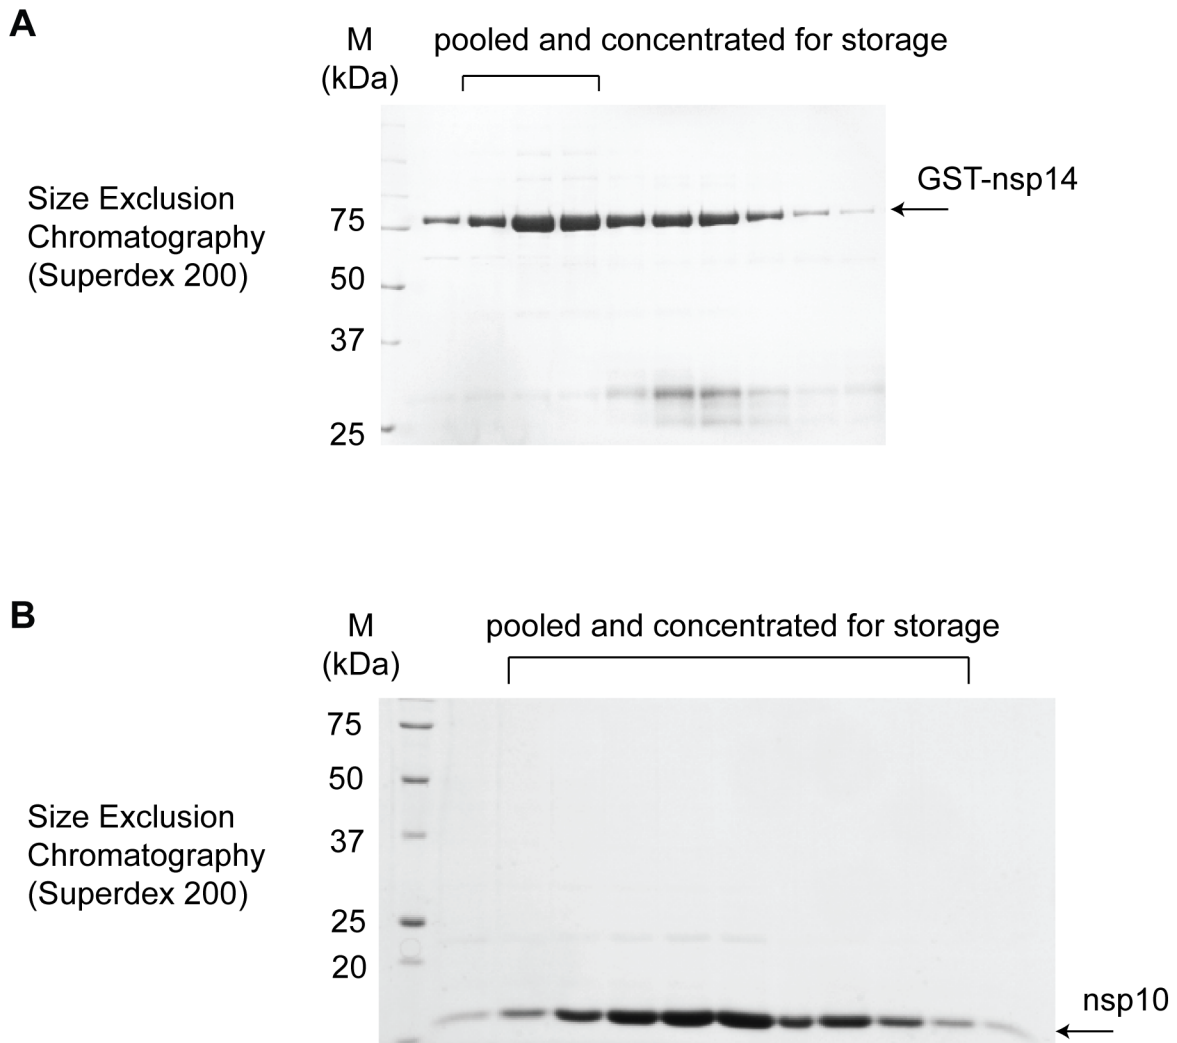

**Figure S3. Purification of recombinant SARS-CoV-2 nsp14 and nsp10 proteins.** (A) GST-nsp14 was purified to near homogeneity using a three-step protocol (Glutathione-agarose, Q anion exchange, and size exclusion chromatography). A gel image after size-exclusion chromatography is shown. (B) SARS-CoV-2 nsp10 was purified to near homogeneity using three-step protocol (Ni-NTA, Q anion exchange, and size exclusion chromatography). A gel image after size-exclusion chromatography is shown.

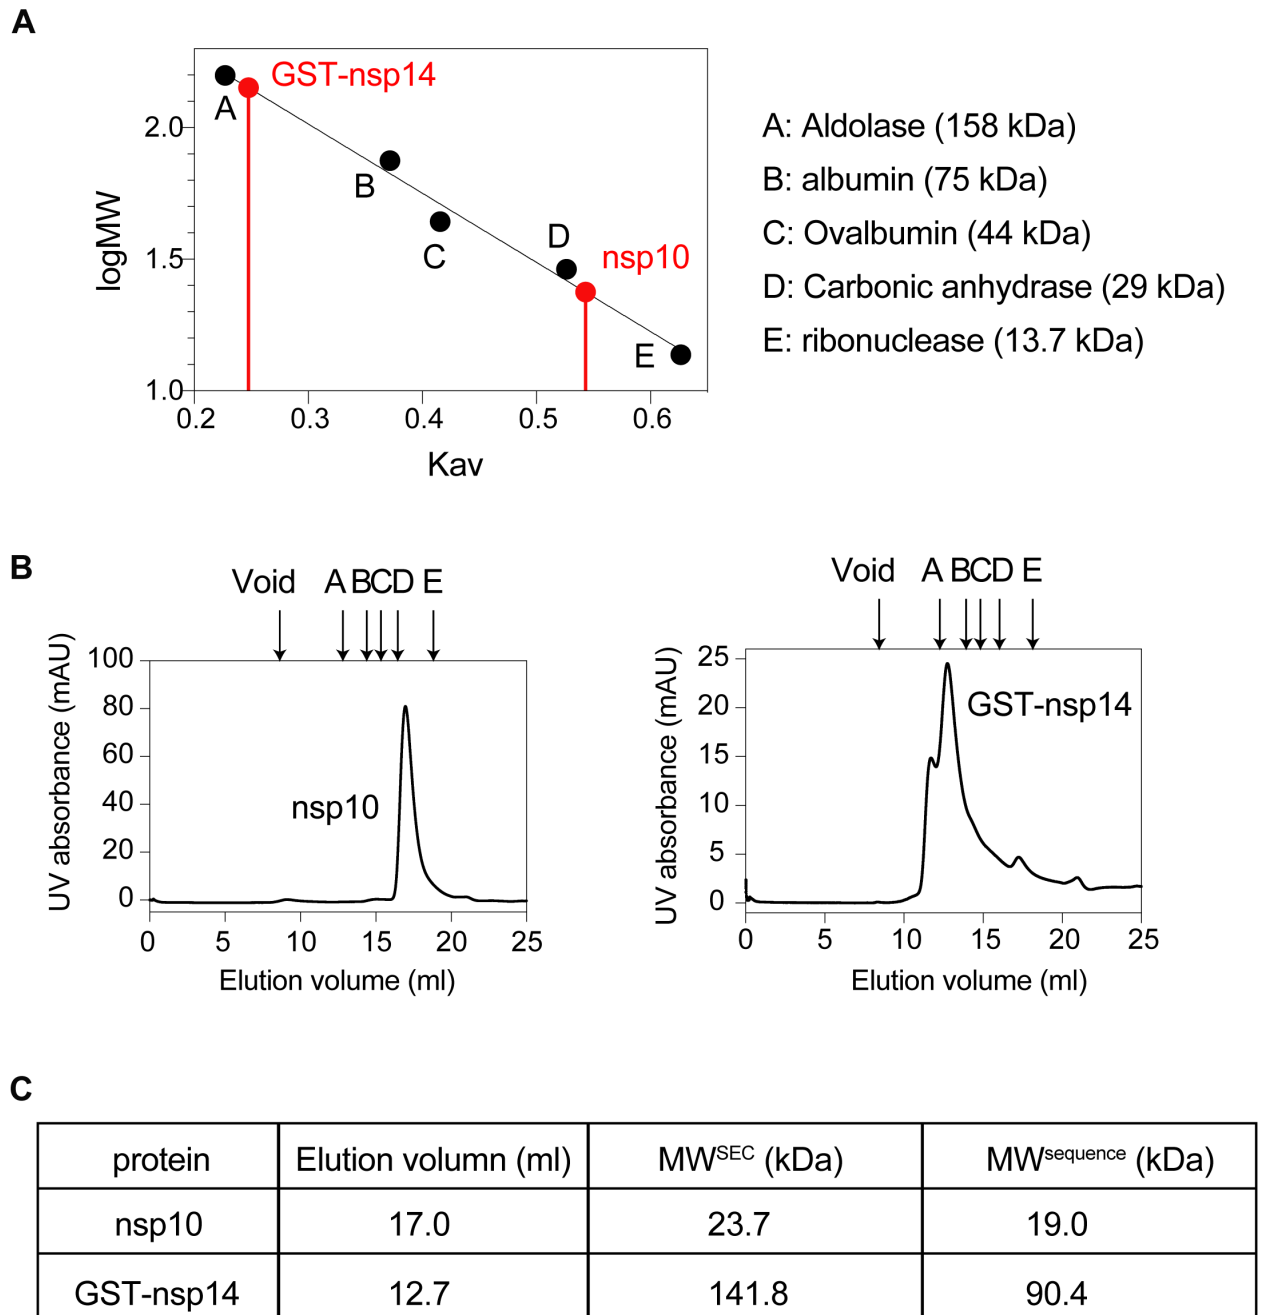

**Figure S4. Size exclusion chromatography of recombinant SARS-CoV-2 nsp14 and nsp10 proteins.** (A) A calibration curve using size exclusion calibration standards. The elution volumes (Kav) and molecular weights (logMW) of SARS-CoV-2 nsp14 (GST-nsp14) and nsp10 (His-nsp10) that are calculated from this standard curve are shown. (B) Size-exclusion chromatograms for SARS-CoV-2 nsp10 (left) and nsp14 (right). GST-nsp14 appears to be in equilibrium between different oligomeric states with the dimeric form as the predominant species. (C) A table showing the molecular weights estimated from the size-exclusion standard.

**Table S1.** RNA and DNA oligonucleotides used in this study.

| <b>Oligo name</b>                        | <b>Sequence 5' → 3'</b>                        |
|------------------------------------------|------------------------------------------------|
| 5'-FAM-20mer-RNA primer                  | 5'-FAM-GUCAUUCUCCUAAGAAGCUA-3'                 |
| 40mer-RNA template                       | 5'-CUAUCCCCAUGUGAUUUUAAUAGCUUCUUAGGAGAAUGAC-3' |
| 5'-FAM-21mer-RNA-A<br>(for A:A mismatch) | 5'-FAM-GUCAUUCUCCUAAGAAGCUA-3'                 |
| 5'-FAM-20mer-DNA primer                  | 5'-FAM-GTCATTCTCCTAAGAAGCTA-3'                 |
| 40mer-DNA template                       | 5'-CTATCCCCATGTGATTTTAATAGCTTCTTAGGAGAATGAC-3' |

## REFERENCES

1. Baddock, H. T., Brolih, S., Yosaatmadja, Y., Ratnaweera, M., Bielinski, M., Swift, L. P., Cruz-Migoni, A., Morris, G. M., Schofield, C. J., Gileadi, O., and McHugh, P. J. (2020) Characterisation of the SARS-CoV-2 ExoN (nsp14ExoN-nsp10) complex: implications for its role in viral genome stability and inhibitor identification. *bioRxiv*, 2020.2008.2013.248211
